# Supplementary material for: Taxonomic validation of five fish species of subfamily Barbinae from the Ganga river system of northern India using traditional and truss analyses
Source: PLoS One. 2018 Oct 26;13(10):e0206031. doi: 10.1371/journal.pone.0206031 (PMC6203374; doi:10.1371/journal.pone.0206031)
Supplement: S1 File — (XLSX) [file pone.0206031.s003.xlsx]

## Sheet: Sheet1
		Maximum Body Depth	Maximum Body Width	Pre-dorsal Length	Pre-ventral Length	Pre-anal Length	Pre-anus length	Depth of Caudal Peduncle	Length of Dorsal Fin	Length of Pelvic Fin	Length of Anal Fin	Pelvic axial scale	Head Length	Eye diameter	Pre-orbital length	Post-orbital length	Inter-orbital length	Inter-narial istance	Maximum head width	Head depth at eye	Scales in the lateral series	Scales in Transverse Series	Pre-dorsal Scales	Caudal Circumferential Scales	Dorsal Fin Rays	Pectoral Fin Rays	Pelvic Fin Rays	Anal Fin Rays	Caudal Fin Rays	Vertebral columns
	1	2	3	4	5	6	7	9	10	12	13	14	15	16	17	18	19	20	21	22	24	25	26	27	28	29	30	31	32	33
P. chola	1	0.364417	0.867092	0.245727	0.285236	0.102305	0.116093	0.704365	0.678036	0.732394	0.732394	1.30642	0.586266	0.623249	0.544068	0.322219	0.322219	0.623249	0.367977	0.720159	25	9	9	11	10	15	7	9	19	27
P. chola	1	0.389452	0.880814	0.26803	0.257564	0.109962	0.124939	0.704722	0.650365	0.734686	0.76687	1.18184	0.538391	0.643453	0.564271	0.30103	0.342423	0.643453	0.38818	0.166331	25	9	8	13	10	14	8	9	19	29
P. chola	1	0.364417	0.867092	0.245727	0.275017	0.0955717	0.109144	0.653213	0.653213	0.732394	0.762357	1.30642	0.510545	0.619789	0.69897	0.443698	0.39794	0.69897	0.356547	0.221849	27	9	9	12	10	15	7	9	19	27
P. chola	1	0.378196	0.893106	0.271741	0.321715	0.135158	0.149169	0.758407	0.612279	0.730378	0.855317	1.15635	0.592076	0.564271	0.643453	0.38818	0.30103	0.564271	0.342423	0.166331	28	9	11	13	10	15	7	9	19	28
P. chola	1	0.3928	0.882887	0.271067	0.311495	0.124939	0.138949	0.669007	0.623249	0.69383	0.810336	1.22531	0.581857	0.564271	0.564271	0.342423	0.342423	0.643453	0.342423	0.166331	27	9	9	13	10	15	7	9	19	27
P. chola	1	0.39794	0.929419	0.285966	0.316635	0.123239	0.137027	0.69897	0.650665	0.725299	0.888026	1.23045	0.586996	0.564271	0.564271	0.342423	0.30103	0.643453	0.30103	0.196295	28	9	9	12	10	15	8	9	19	27
P. chola	1	0.37501	0.839897	0.265866	0.295829	0.0995342	0.112898	0.688629	0.663806	0.714958	0.77295	1.22011	0.576655	0.564271	0.564271	0.342423	0.30103	0.643453	0.30103	0.196295	27	10	10	13	10	15	7	9	19	28
P. chola	1	0.37501	0.805135	0.275625	0.306294	0.106165	0.112898	0.663806	0.663806	0.714958	0.77295	1.14093	0.576655	0.564271	0.643453	0.30103	0.30103	0.643453	0.342423	0.228479	26	9	9	12	10	15	8	9	19	27
P. chola	1	0.410905	0.888026	0.266661	0.316635	0.123239	0.144089	0.725299	0.650665	0.69897	0.753328	1.15127	0.6072	0.544068	0.544068	0.322219	0.322219	0.623249	0.280827	0.208276	28	10	9	11	10	15	7	9	19	27
P. chola	1	0.364417	0.867092	0.245727	0.285236	0.102305	0.116093	0.704365	0.678036	0.732394	0.732394	1.30642	0.586266	0.623249	0.544068	0.322219	0.322219	0.623249	0.367977	0.720159	25	9	9	11	10	15	7	9	19	28
P. chola	1	0.389452	0.880814	0.26803	0.257564	0.109962	0.124939	0.704722	0.650365	0.734686	0.76687	1.18184	0.538391	0.643453	0.564271	0.30103	0.342423	0.643453	0.38818	0.166331	24	9	8	13	10	14	8	9	19	29
P. chola	1	0.364417	0.867092	0.245727	0.275017	0.0955717	0.109144	0.653213	0.653213	0.732394	0.762357	1.30642	0.510545	0.619789	0.69897	0.443698	0.39794	0.69897	0.356547	0.221849	27	9	9	12	10	15	7	9	19	27
P. conchonious	2	0.283997	0.69897	0.283997	0.221849	0.0861861	0.119186	0.552842	0.657577	0.744727	0.744727	1.09691	0.619789	0.477121	0.60206	0.30103	0.30103	0.477121	0.30103	0.176091	24	9	9	12	11	12	7	9	19	25
P. conchonious	2	0.30963	0.80448	0.230449	0.230449	0.10551	0.0947863	0.666177	0.70757	0.628389	0.753328	1.0086	0.531479	0.477121	0.69897	0.273001	0.39794	0.574031	0.39794	0.221849	26	9	9	12	11	13	8	9	19	25
P. conchonious	2	0.308454	0.691671	0.21455	0.265702	0.117639	0.137384	0.656909	0.691671	0.770852	0.867762	1.16879	0.594761	0.477121	0.69897	0.273001	0.273001	0.477121	0.39794	0.221849	26	10	8	12	11	12	7	9	19	25
P. conchonious	2	0.286307	0.763428	0.21936	0.244914	0.10067	0.110215	0.6173	0.722035	0.763428	0.985277	1.16137	0.587337	0.477121	0.574031	0.330993	0.273001	0.477121	0.39794	0.176091	26	9	9	12	11	12	8	9	19	25
P. conchonious	2	0.338172	0.78533	0.229027	0.266816	0.122572	0.141877	0.671386	0.706149	0.743937	0.88224	1.08636	0.58121	0.60206	0.60206	0.359022	0.30103	0.50515	0.30103	0.162727	26	9	8	12	11	13	8	9	19	25
P. conchonious	2	0.363178	0.823909	0.246672	0.259637	0.124939	0.144683	0.664208	0.736759	0.69897	0.875061	1.17609	0.574031	0.60206	0.60206	0.359022	0.30103	0.50515	0.30103	0.20412	24	10	10	11	11	14	8	9	19	25
P. conchonious	2	0.308454	0.729459	0.27949	0.265702	0.108094	0.127399	0.729459	0.729459	0.691671	0.816609	1.16879	0.566732	0.50515	0.60206	0.425969	0.30103	0.60206	0.30103	0.162727	25	9	9	12	11	12	8	9	19	25
P. conchonious	2	0.31527	0.750999	0.273878	0.248324	0.120294	0.139179	0.750999	0.71321	0.71321	0.838149	1.19033	0.588272	0.50515	0.50515	0.359022	0.30103	0.50515	0.249877	0.124939	24	9	9	12	11	13	8	9	19	25
S. sarana	3	0.471212	0.691354	0.296626	0.316415	0.115617	0.155899	0.955811	0.656292	0.767877	0.83409	1.13143	0.650932	0.645157	0.44628	0.272371	0.299444	0.442899	0.151961	0.220946	32	10	11	16	13	15	9	9	19	32
S. sarana	3	0.445385	0.722479	0.272293	0.318414	0.141765	0.173559	0.865596	0.650096	0.750591	0.870953	1.32954	0.643661	0.536707	0.409842	0.325808	0.24544	0.438255	0.117663	0.235974	30	10	11	16	12	15	9	9	19	32
S. sarana	3	0.468962	0.758238	0.2561	0.289139	0.106352	0.13339	0.845098	0.570809	0.704246	0.745682	1.20569	0.605809	0.576713	0.457561	0.258666	0.406006	0.540917	0.179728	0.241288	32	10	11	14	12	14	9	9	19	32
S. sarana	3	0.436629	0.799379	0.302269	0.310249	0.123378	0.137894	0.848487	0.589013	0.707137	0.797435	1.15006	0.617963	0.727926	0.560298	0.279546	0.349863	0.60571	0.239339	0.21534	33	10	10	16	12	14	9	9	19	34
S. sarana	3	0.455626	0.729925	0.30451	0.317173	0.125728	0.155224	0.850942	0.584008	0.746486	0.787495	1.18249	0.616664	0.64159	0.511571	0.309767	0.322971	0.659922	0.244949	0.23702	32	10.5	11	16	13	15	9	9	19	32
S. sarana	3	0.476771	0.738993	0.281903	0.305312	0.126967	0.157788	0.886596	0.635918	0.747885	0.77973	1.132	0.640996	0.563124	0.498988	0.294063	0.391413	0.583194	0.14815	0.198361	33	10	11	16	12	14	9	9	19	33
S. sarana	3	0.441953	0.703129	0.291022	0.322918	0.141268	0.166864	0.847724	0.610724	0.785647	0.831353	1.20672	0.62584	0.596407	0.561645	0.250182	0.391093	0.508917	0.173099	0.259656	32	10	11	16	12	14	9	9	20	32
S. sarana	3	0.494232	0.798884	0.30499	0.328342	0.140766	0.16552	0.854749	0.58849	0.779725	0.835048	1.19413	0.607279	0.672662	0.56692	0.230617	0.391271	0.631218	0.305736	0.27642	32	10	11	16	12	14	9	9	19	32
S. sarana	3	0.452875	0.743892	0.262327	0.30191	0.128634	0.152976	0.828899	0.577969	0.742372	0.80846	1.21587	0.616524	0.574344	0.524852	0.284102	0.363458	0.500811	0.00560093	0.163885	32	10	11	16	12	14	9	9	20	32
S. sarana	3	0.481622	0.782827	0.281902	0.32116	0.1287	0.149468	0.861763	0.591756	0.780381	0.857581	1.27293	0.644476	0.660471	0.525306	0.264283	0.318048	0.517687	0.224917	0.175073	32	10.5	11	14	12	15	9	9	20	33
S. sarana	3	0.503667	0.775533	0.311402	0.330135	0.145316	0.165423	0.870176	0.655123	0.784207	0.807498	1.23274	0.645031	0.604937	0.483527	0.293735	0.407139	0.511354	0.17759	0.256621	32	10	11	14	13	14	9	9	19	32
S. sarana	3	0.465812	0.725128	0.286354	0.30979	0.139457	0.162713	0.891422	0.734153	0.8471	0.908112	1.27467	0.612647	0.613409	0.544068	0.314374	0.3883	0.614294	0.194406	0.199662	33	11	11	14	12	14	9	10	19	32
S. sarana	3	0.469292	0.75137	0.28002	0.330365	0.135294	0.150096	0.856813	0.664261	0.792928	0.835424	1.30749	0.61876	0.615603	0.490437	0.285763	0.366181	0.569482	0.203437	0.212869	34	10	11	14	12	14	9	9	19	32
S. sarana	3	0.487125	0.730728	0.277159	0.31136	0.134683	0.154257	0.890561	0.645105	0.792014	0.83496	1.29032	0.642296	0.624263	0.487694	0.301353	0.30525	0.565026	0.135071	0.138168	32	10	11	14	12	14	9	9	19	33
S. sarana	3	0.470455	0.76377	0.273352	0.302742	0.114723	0.138198	0.879836	0.670234	0.790635	0.840805	1.31155	0.597423	0.599546	0.514931	0.294886	0.40168	0.645152	0.221276	0.228779	32	10	11	14	12	14	9	9	19	32
S. sarana	3	0.478212	0.798708	0.292633	0.317715	0.12904	0.146464	0.864145	0.655101	0.756222	0.854352	1.15475	0.629649	0.646551	0.49427	0.24606	0.355647	0.536172	0.168504	0.202342	32	11	11	14	12	14	9	9	19	32
S. sarana	3	0.47681	0.759457	0.28717	0.341724	0.143517	0.200345	0.876814	0.662337	0.799452	0.881528	1.33756	0.711474	0.655765	0.431279	0.309596	0.265052	0.532536	0.0839575	0.187406	32	11	11	14	13	14	9	11	19	32
S. sarana	3	0.502822	0.814655	0.276335	0.299213	0.125519	0.167365	0.917822	0.527901	0.767119	0.867736	1.14013	0.598515	0.561489	0.567513	0.224594	0.356473	0.482906	0.245178	0.197116	32	11	11	14	12	13	9	9	19	33
S. sarana	3	0.497244	0.851958	0.295133	0.342211	0.140269	0.167981	0.939557	0.607425	0.777509	0.838456	1.12766	0.598033	0.576737	0.519099	0.27599	0.407103	0.561185	0.247784	0.264267	31	10	11	14	12	14	9	9	19	32
S. sarana	3	0.470711	0.695967	0.267826	0.293963	0.103717	0.128896	0.882224	0.689179	0.774742	0.859209	1.32801	0.604456	0.663729	0.500054	0.299302	0.341091	0.53541	0.162287	0.233194	30	10	11	16	12	15	9	9	19	32
S. sarana	3	0.4744	0.743794	0.295841	0.302277	0.136439	0.161045	0.867001	0.641565	0.751243	0.847661	1.33521	0.655666	0.768378	0.434957	0.301821	0.344881	0.448623	0.161274	0.197879	31	10	11	16	12	14	9	9	19	32
S. sarana	3	0.488645	0.747952	0.261066	0.300499	0.129953	0.150542	0.895688	0.66059	0.748989	0.799833	1.19836	0.625739	0.548139	0.459517	0.278763	0.391688	0.567178	0.184421	0.228374	30	10	11	14	12	15	9	9	19	34
S. sarana	3	0.464017	0.746646	0.256356	0.282731	0.116676	0.137606	0.88568	0.689402	0.770255	0.887933	1.04442	0.636822	0.611993	0.432315	0.266634	0.359128	0.50256	0.170583	0.201194	30	10	11	16	13	15	9	9	20	32
S. sarana	3	0.519209	0.801607	0.284779	0.306776	0.140914	0.160857	0.90894	0.637792	0.740067	0.808004	1.32237	0.623728	0.575737	0.503876	0.345025	0.35202	0.505258	0.165359	0.194476	30	10	11	14	12	14	9	9	20	32
P. sophore	4	0.369911	0.79588	0.273001	0.30686	0.111633	0.126873	0.761118	0.670941	0.728933	0.79588	1.09691	0.574031	0.60206	0.69897	0.30103	0.259637	0.69897	0.259637	0.60206	23	8	9	12	9	15	8	9	19	26
P. sophore	4	0.314818	0.80618	0.274701	0.249877	0.0579919	0.0737862	0.726999	0.575731	0.692237	0.80618	1.10721	0.50515	0.60206	0.69897	0.30103	0.30103	0.69897	0.30103	0.522879	24	8	8	13	9	15	8	9	19	26
P. sophore	4	0.380211	0.823909	0.246672	0.315753	0.124939	0.144683	0.69897	0.632023	0.736759	0.823909	1.17609	0.574031	0.50515	0.60206	0.30103	0.425969	0.726999	0.425969	0.359022	23	8	8	12	9	15	8	9	19	26
P. sophore	4	0.371961	0.82193	0.261263	0.30702	0.130929	0.14732	0.632874	0.60805	0.717195	0.863323	1.16435	0.562293	0.522879	0.69897	0.259637	0.346787	0.60206	0.259637	0.30103	24	8	9	11	9	15	8	9	19	26
P. sophore	4	0.360616	0.850702	0.279311	0.279311	0.121243	0.13622	0.613341	0.613341	0.687975	0.850702	1.11394	0.591065	0.522879	0.69897	0.259637	0.346787	0.60206	0.30103	0.259637	25	8	9	12	9	15	8	9	19	26
P. sophore	4	0.400733	0.989005	0.248642	0.290035	0.121243	0.13622	0.636822	0.687975	0.745967	0.892095	1.11394	0.569875	0.623249	0.845098	0.322219	0.280827	0.623249	0.322219	0.322219	25	8	9	12	9	15	8	9	19	26
P. ticto	5	0.360151	0.962211	0.249001	0.277965	0.127579	0.149298	0.69897	0.78612	0.740363	0.895265	1.26324	0.564271	0.477121	0.574031	0.39794	0.39794	0.574031	0.574031	0.176091	25	8	10	11	9	12	9	9	19	25
P. ticto	5	0.362548	0.879178	0.261878	0.277118	0.133211	0.156074	0.724276	0.724276	0.682883	0.770033	1.12222	0.548185	0.477121	0.574031	0.39794	0.330993	0.574031	0.477121	0.221849	23	9	10	11	9	12	9	9	19	25
P. ticto	5	0.372912	0.925754	0.265702	0.27949	0.127399	0.147603	0.770852	0.729459	0.691671	0.770852	1.16879	0.566732	0.50515	0.60206	0.425969	0.359022	0.60206	0.50515	0.20412	24	8	10	11	9	12	9	9	19	25
P. ticto	5	0.413452	0.977724	0.264513	0.278754	0.143091	0.16481	0.714482	0.714482	0.755875	0.852785	1.27875	0.579784	0.477121	0.574031	0.39794	0.330993	0.574031	0.39794	0.176091	24	9	11	12	9	11	9	9	19	26
P. ticto	5	0.378635	0.837273	0.249001	0.263241	0.127579	0.149298	0.69897	0.69897	0.740363	0.78612	1.1383	0.564271	0.477121	0.477121	0.39794	0.330993	0.574031	0.273001	0.176091	25	9	10	11	9	12	9	9	19	25
P. ticto	5	0.370666	0.829304	0.285236	0.269996	0.130334	0.15261	0.691001	0.691001	0.691001	0.829304	1.13033	0.61845	0.414973	0.511883	0.414973	0.268845	0.511883	0.268845	0.159701	24	9	11	11	9	12	9	9	19	25
P. ticto	5	0.370666	0.829304	0.269996	0.285236	0.130334	0.15261	0.691001	0.732394	0.691001	0.887296	1.25527	0.586266	0.447158	0.447158	0.367977	0.30103	0.447158	0.367977	0.191886	23	9	11	11	9	11	9	9	19	28
P. ticto	5	0.359022	0.90309	0.249877	0.283301	0.124939	0.149762	0.639849	0.639849	0.639849	0.836143	1.20412	0.60206	0.380211	0.477121	0.380211	0.30103	0.477121	0.30103	0.176091	22	8	11	12	9	12	9	9	19	25
P. ticto	5	0.425969	0.970037	0.28579	0.316824	0.157123	0.179986	0.748188	0.706795	0.748188	0.90309	1.27107	0.634245	0.414973	0.511883	0.335792	0.268845	0.511883	0.335792	0.159701	25	9	11	11	9	11	9	9	19	25
P. ticto	5	0.380211	0.933053	0.246672	0.259637	0.124939	0.144683	0.736759	0.736759	0.69897	0.823909	1.17609	0.574031	0.425969	0.359022	0.30103	0.30103	0.50515	0.425969	0.20412	25	8	10	11	9	12	9	9	19	26
P. ticto	5	0.359022	0.90309	0.249877	0.283301	0.124939	0.149762	0.639849	0.639849	0.639849	0.836143	1.20412	0.60206	0.380211	0.477121	0.380211	0.30103	0.477121	0.30103	0.176091	24	9	10	11	9	11	9	9	19	25
P. ticto	5	0.367977	0.845098	0.243038	0.256826	0.146128	0.168404	0.706795	0.706795	0.748188	0.845098	1.27107	0.60206	0.447158	0.544068	0.367977	0.30103	0.544068	0.367977	0.146128	24	9	11	11	9	11	9	9	19	25
P. ticto	5	0.378635	0.895265	0.249001	0.263241	0.127579	0.149298	0.69897	0.69897	0.740363	0.78612	1.1383	0.564271	0.477121	0.477121	0.39794	0.330993	0.574031	0.273001	0.176091	25	8	10	11	9	12	9	9	19	25
P. ticto	5	0.370666	0.829304	0.269996	0.285236	0.130334	0.15261	0.691001	0.732394	0.691001	0.887296	1.25527	0.586266	0.447158	0.447158	0.367977	0.30103	0.447158	0.367977	0.191886	25	8	10	12	9	12	9	9	19	25
P. ticto	5	0.360151	0.962211	0.249001	0.277965	0.127579	0.149298	0.69897	0.78612	0.740363	0.895265	1.26324	0.564271	0.477121	0.574031	0.39794	0.39794	0.574031	0.574031	0.176091	23	9	11	11	9	12	9	9	19	25
P. ticto	5	0.365488	0.91833	0.258278	0.272066	0.12996	0.150644	0.763428	0.722035	0.684247	0.763428	1.16137	0.559308	0.50515	0.60206	0.425969	0.359022	0.60206	0.50515	0.20412	25	9	10	11	9	12	9	9	19	27
P. ticto	5	0.370666	0.829304	0.269996	0.285236	0.130334	0.15261	0.691001	0.732394	0.691001	0.887296	1.25527	0.586266	0.447158	0.447158	0.367977	0.30103	0.447158	0.367977	0.191886	24	9	11	11	9	12	9	9	19	25
P. ticto	5	0.362548	0.879178	0.261878	0.277118	0.133211	0.156074	0.724276	0.724276	0.682883	0.770033	1.12222	0.548185	0.477121	0.574031	0.39794	0.330993	0.574031	0.477121	0.221849	24	8	11	11	9	12	9	9	19	25
P. ticto	5	0.350248	0.90309	0.256826	0.28579	0.135404	0.157123	0.706795	0.793946	0.748188	0.90309	1.27107	0.572097	0.477121	0.574031	0.39794	0.39794	0.574031	0.574031	0.176091	25	9	11	11	9	11	9	9	19	27
P. ticto	5	0.347773	0.912045	0.258832	0.292256	0.146128	0.158717	0.648803	0.648803	0.648803	0.845098	1.21307	0.611015	0.380211	0.477121	0.380211	0.30103	0.477121	0.30103	0.176091	25	10	10	11	9	12	9	9	19	25
