# Supplementary material for: Taxonomic validation of five fish species of subfamily Barbinae from the Ganga river system of northern India using traditional and truss analyses
Source: PLoS One. 2018 Oct 26;13(10):e0206031. doi: 10.1371/journal.pone.0206031 (PMC6203374; doi:10.1371/journal.pone.0206031)
Supplement: S2 File — (XLSX) [file pone.0206031.s004.xlsx]

## Sheet: Sheet1
			mtrans	mtrans	mtrans	mtrans	mtrans	mtrans	mtrans	mtrans	mtrans	mtrans	mtrans	mtrans	mtrans	mtrans	mtrans	mtrans	mtrans	mtrans	mtrans	mtrans	mtrans	mtrans	mtrans	mtrans	mtrans	mtrans	mtrans	mtrans	mtrans	mtrans	mtrans	mtrans	mtrans	mtrans	mtrans	mtrans	mtrans	mtrans	mtrans	mtrans	mtrans	mtrans	mtrans	mtrans	mtrans	mtrans	mtrans
			1 2	1 3	1 4	1 5	1 7	1 8	1 9	1 10	1 11	1 12	1 13	1 14	2 3	2 4	2 5	2 6	2 7	2 8	2 9	2 10	2 11	2 12	2 13	2 14	3 4	3 5	3 6	3 7	3 8	3 9	3 10	3 11	3 12	3 13	3 14	4 5	4 6	4 7	4 8	4 9	4 10	4 11	4 12	4 13	4 14	5 6	5 7
		1	2	3	4	5	6	7	8	9	10	11	12	13	14	15	16	17	18	19	20	21	22	23	24	25	26	27	28	29	30	31	32	33	34	35	36	37	38	39	40	41	42	43	44	45	46	47	48
P. chola	IMG_8482	1	0.152245	0.604711	0.737008	0.872855	0.870023	0.788434	0.748692	0.573836	0.25394	0.215153	-0.115662	-0.650999	0.423772	0.624938	0.800682	0.820325	0.806739	0.714604	0.677721	0.505111	0.193018	0.0152119	-0.029104	0.0971945	0.250816	0.598041	0.640895	0.636728	0.523002	0.515262	0.470343	0.479122	0.424954	0.524175	0.582346	0.33978	0.415578	0.417246	0.26591	0.326725	0.477092	0.606392	0.589618	0.672869	0.719018	-0.234651	0.00692384
P. chola	IMG_8486	1	0.203223	0.711056	0.807075	0.957037	0.954209	0.882405	0.835887	0.670839	0.31798	0.242268	-0.105944	-0.601088	0.557832	0.699942	0.889599	0.908705	0.89441	0.814001	0.768512	0.604118	0.291302	0.0970837	0.0248139	0.143795	0.224973	0.650929	0.697317	0.691656	0.58761	0.571872	0.550118	0.610415	0.570998	0.645432	0.690586	0.449987	0.518856	0.512458	0.369049	0.39976	0.532372	0.693234	0.680426	0.751595	0.789933	-0.145142	0.0795792
P. chola	IMG_8492	1	0.178315	0.702853	0.798298	0.953102	0.94602	0.883605	0.830146	0.66388	0.272631	0.226058	-0.119026	-0.617353	0.556712	0.696453	0.889727	0.908823	0.889531	0.820208	0.767178	0.602375	0.269816	0.0944012	-0.00555086	0.123427	0.224041	0.653608	0.697726	0.687618	0.598397	0.573869	0.55112	0.617483	0.569069	0.63771	0.683641	0.455941	0.520431	0.506356	0.380501	0.397314	0.526921	0.698622	0.675201	0.743188	0.781763	-0.192763	0.0832159
P. chola	IMG_8496	1	0.212214	0.685052	0.787411	0.934958	0.937533	0.870082	0.822332	0.648867	0.326295	0.312452	-0.0231779	-0.357931	0.512818	0.667518	0.85918	0.881065	0.870538	0.79476	0.746945	0.569737	0.274343	0.0766768	-0.0152207	0.110657	0.211201	0.632164	0.681431	0.681106	0.588843	0.566296	0.526326	0.574089	0.490436	0.598911	0.647579	0.426202	0.50199	0.505381	0.385428	0.404252	0.519132	0.664294	0.619834	0.715987	0.756027	-0.155722	0.064458
P. chola	IMG_8498	1	0.163191	0.662484	0.785807	0.935809	0.957526	0.893262	0.850107	0.653714	0.295567	0.201315	-0.153867	-0.667501	0.505909	0.683317	0.86902	0.902715	0.900356	0.830845	0.787609	0.603859	0.307838	0.0990242	0.0487136	0.104385	0.254258	0.64063	0.70206	0.71054	0.623404	0.590429	0.5614	0.588451	0.531836	0.605811	0.642385	0.414321	0.511067	0.524604	0.402519	0.393926	0.564074	0.694096	0.671636	0.738011	0.770277	-0.139584	0.0708503
P. chola	IMG_8503	1	0.284498	0.714414	0.830736	0.999674	0.989485	0.917563	0.869765	0.687832	0.39354	0.359456	0.0812032	-0.258541	0.520025	0.701248	0.922336	0.93877	0.918324	0.836299	0.787368	0.599261	0.308159	0.113475	0.0214374	0.168232	0.281102	0.725609	0.759826	0.742874	0.638858	0.605607	0.543869	0.572976	0.507384	0.607702	0.668637	0.532894	0.584704	0.563801	0.424441	0.429381	0.550986	0.686225	0.660524	0.746665	0.794328	-0.175711	0.0964581
P. chola	IMG_8510	1	0.246006	0.688313	0.799106	0.947997	0.934529	0.885446	0.823344	0.652488	0.36269	0.309204	-0.0224319	-0.360006	0.503178	0.67663	0.871555	0.895837	0.86559	0.810629	0.746696	0.577009	0.310948	0.122707	0.0425755	0.142952	0.256718	0.659089	0.708412	0.681413	0.614602	0.568941	0.531836	0.563754	0.505611	0.602505	0.64913	0.441569	0.51904	0.483059	0.393119	0.388989	0.524734	0.660401	0.640253	0.72923	0.767949	-0.156014	0.0854333
P. conchonius	IMG_8412	2	0.0534626	0.540917	0.642356	0.801993	0.796213	0.734472	0.695228	0.569397	0.211174	0.155822	-0.173187	-0.618416	0.378471	0.530123	0.735719	0.753392	0.738265	0.670042	0.632467	0.511897	0.167731	0.0371874	-0.134541	-0.0217464	0.0662514	0.52136	0.563872	0.558817	0.476281	0.460778	0.432408	0.426528	0.388012	0.459181	0.512671	0.333971	0.398652	0.397297	0.293716	0.308266	0.384353	0.511402	0.497054	0.573046	0.618561	-0.292345	-0.0458251
P. conchonius	IMG_8403	2	0.0208169	0.551499	0.65673	0.811005	0.803655	0.743243	0.684343	0.557267	0.22191	0.175454	-0.176063	-0.626408	0.403189	0.55268	0.747357	0.756431	0.745395	0.677981	0.618257	0.489902	0.137987	0.00130093	-0.190669	-0.0779496	0.0935968	0.530686	0.558228	0.559715	0.477888	0.450157	0.425453	0.429284	0.387087	0.474406	0.522549	0.333165	0.376705	0.384891	0.279872	0.300748	0.390812	0.520549	0.504403	0.591076	0.633519	-0.413818	-0.0970023
P. conchonius	IMG_8400	2	0.0714033	0.596278	0.681277	0.823481	0.813814	0.755585	0.705145	0.541604	0.194514	0.19078	-0.130856	-0.603905	0.449818	0.576549	0.760189	0.764968	0.758723	0.69493	0.645344	0.488889	0.163281	0.0419845	-0.14598	-0.0100254	0.0902228	0.529135	0.555771	0.571313	0.500319	0.482516	0.475424	0.496085	0.437751	0.514375	0.569573	0.333064	0.374437	0.403635	0.31662	0.334112	0.447794	0.564216	0.528595	0.609872	0.658317	-0.357615	-0.0209117
P. conchonius	IMG_8395	2	0.0782393	0.597278	0.674402	0.811099	0.80867	0.76104	0.708914	0.569807	0.234188	0.18935	-0.153428	-0.559878	0.447979	0.561364	0.738868	0.756697	0.745496	0.692283	0.641434	0.506627	0.170643	0.0353497	-0.140531	-0.0157968	0.00143081	0.470249	0.518764	0.527359	0.461574	0.449602	0.450526	0.475119	0.438859	0.519185	0.567132	0.290413	0.361803	0.380121	0.300487	0.328359	0.428264	0.542302	0.524656	0.606274	0.648497	-0.322129	-0.0172179
P. conchonius	IMG_8393	2	0.0752184	0.5524	0.619459	0.800174	0.800985	0.704073	0.656319	0.494405	0.221179	0.180957	-0.118131	-0.552361	0.380157	0.484869	0.723489	0.716563	0.728954	0.619969	0.573603	0.416923	0.143639	-0.00687251	-0.151417	-0.0224822	-0.0688372	0.500031	0.527037	0.527514	0.40468	0.403858	0.417505	0.432889	0.382161	0.462218	0.518987	0.366591	0.400952	0.400762	0.243757	0.278982	0.393996	0.479834	0.450649	0.536483	0.58967	-0.0493869	-0.306713
P. conchonius	IMG_8388	2	0.0557605	0.493514	0.606983	0.781935	0.7661	0.700106	0.651985	0.500895	0.162953	0.142859	-0.143954	-0.488986	0.302201	0.477425	0.705282	0.711301	0.695919	0.621093	0.576744	0.428993	0.126878	-0.0592993	-0.190602	-0.0694126	0.0475474	0.508664	0.52979	0.523785	0.43191	0.422409	0.382035	0.392187	0.303693	0.391182	0.44753	0.325228	0.356657	0.354108	0.236714	0.281942	0.367859	0.490464	0.442041	0.524422	0.570811	-0.357951	-0.0375691
P. conchonius	IMG_8383	2	0.0177844	0.527514	0.61764	0.759305	0.762371	0.696138	0.651452	0.482116	0.168527	0.104555	-0.204572	-0.651286	0.37236	0.505421	0.68702	0.712759	0.699126	0.624839	0.583153	0.418765	0.131298	-0.0180818	-0.182944	-0.0582501	0.0119931	0.438352	0.499495	0.496764	0.405688	0.407051	0.400365	0.430301	0.391147	0.449694	0.500991	0.236865	0.328502	0.327625	0.209193	0.261976	0.386178	0.501566	0.484741	0.549751	0.594547	-0.270527	-0.0793811
P. conchonius	IMG_8382	2	0.202652	0.617923	0.721192	0.872448	0.847227	0.788706	0.738352	0.57373	0.254185	0.252416	-0.085107	-0.524547	0.414238	0.580902	0.785963	0.801115	0.766933	0.698779	0.650482	0.497206	0.223678	0.0512297	0.0134692	0.127202	0.142608	0.575903	0.616118	0.583675	0.500497	0.488396	0.488156	0.511964	0.431991	0.533683	0.587318	0.376595	0.439554	0.400192	0.297367	0.34557	0.490268	0.603307	0.556544	0.650337	0.696085	-0.183335	0.0556077
P. conchonius	IMG_8378	2	0.0305188	0.55524	0.648087	0.805841	0.79476	0.738392	0.687386	0.519631	0.19092	0.13615	-0.188633	-0.637932	0.405039	0.539503	0.739303	0.7547	0.73488	0.670626	0.622825	0.461904	0.140948	-0.0132954	-0.133057	-0.0589211	0.0541532	0.510853	0.553045	0.545171	0.461018	0.461138	0.455043	0.457109	0.413317	0.486232	0.52781	0.325639	0.38755	0.381097	0.267899	0.321391	0.438099	0.531862	0.511683	0.585765	0.625137	-0.285503	-0.0137659
P. conchonius	IMG_5748	2	0.107753	0.566838	0.661888	0.804862	0.795831	0.744356	0.69024	0.523655	0.214844	0.158664	-0.136659	-0.615217	0.385284	0.534508	0.723956	0.739572	0.723735	0.665253	0.615834	0.463475	0.1827	-0.00205036	-0.0656379	0.024978	0.102434	0.504946	0.54866	0.547048	0.480926	0.482616	0.483459	0.477107	0.418102	0.489776	0.538109	0.289344	0.356255	0.358201	0.269886	0.331508	0.459076	0.545295	0.517579	0.591932	0.63831	-0.271776	-0.0146723
P. conchonius	IMG_5423	2	-0.000360614	0.476629	0.576099	0.721811	0.719514	0.659859	0.61272	0.453716	0.151554	0.138429	-0.155709	-0.597911	0.305394	0.455849	0.646325	0.665065	0.652942	0.587026	0.543049	0.392556	0.098055	0.00966332	-0.189116	-0.0974913	-0.000469291	0.422524	0.469233	0.470058	0.397697	0.392539	0.378943	0.368937	0.319689	0.383349	0.441805	0.2173	0.289946	0.29695	0.210265	0.253459	0.361048	0.447778	0.417887	0.493695	0.546715	-0.35808	-0.115346
P. conchonius	IMG_5247	3	0.195429	0.640481	0.748521	0.911451	0.914909	0.844384	0.798202	0.618278	0.332782	0.276347	-0.0330421	-0.462874	0.453089	0.620032	0.833912	0.85717	0.846992	0.766576	0.720292	0.537303	0.279188	0.0881006	0.0299111	0.131619	0.182301	0.628971	0.676895	0.677397	0.57679	0.550998	0.496335	0.528518	0.461919	0.55806	0.612572	0.437418	0.509579	0.5148	0.382251	0.389928	0.489171	0.6181	0.58891	0.677004	0.724038	-0.171173	0.06989
S. sarana	IMG_5638	3	0.329764	0.825965	0.930195	1.07192	1.07679	1.0204	0.975597	0.769924	0.50409	0.447701	0.104794	-0.340264	0.664623	0.816374	0.998046	1.02346	1.01157	0.947875	0.900444	0.683929	0.417837	0.260334	0.0866089	0.250908	0.338178	0.75586	0.810098	0.810152	0.726898	0.689398	0.63763	0.690329	0.650609	0.741325	0.798188	0.547098	0.631738	0.63805	0.529815	0.518106	0.659498	0.788826	0.775618	0.86126	0.90711	-0.0301603	0.220239
S. sarana	IMG_5700	3	0.239174	0.706248	0.805419	0.960571	0.96602	0.901774	0.853577	0.709032	0.388332	0.326315	-0.0209481	-0.518199	0.534508	0.68219	0.881208	0.906604	0.895776	0.823396	0.773538	0.630946	0.333306	0.143795	-0.00219874	0.164858	0.174961	0.632791	0.685751	0.68182	0.582711	0.544267	0.525434	0.579246	0.52398	0.619771	0.679982	0.449247	0.525563	0.522874	0.394014	0.38851	0.519854	0.673371	0.648604	0.735878	0.784325	-0.11316	0.116043
S. sarana	IMG_5769	3	0.222742	0.70124	0.813334	0.948247	0.939988	0.885389	0.833721	0.650502	0.382809	0.359551	-0.0130134	-0.433233	0.534813	0.703713	0.879325	0.89451	0.879136	0.81781	0.766428	0.578868	0.309545	0.175657	-0.0185484	0.146624	0.280897	0.661851	0.701084	0.696164	0.619886	0.592255	0.53763	0.561519	0.500826	0.61308	0.671617	0.428313	0.495447	0.496694	0.39606	0.416541	0.538071	0.662503	0.63727	0.7434	0.788699	-0.1835	0.071882
S. sarana	IMG_5838	3	0.225774	0.688028	0.796227	0.962696	0.957099	0.886699	0.844881	0.699144	0.397279	0.335197	0.00659439	-0.42927	0.50795	0.667378	0.88265	0.900094	0.883463	0.801047	0.756362	0.59961	0.303779	0.130044	-0.0218469	0.13526	0.180642	0.658317	0.697926	0.68711	0.571511	0.537932	0.485707	0.553847	0.50496	0.596696	0.655868	0.482602	0.54219	0.534686	0.388758	0.391023	0.493458	0.660439	0.639725	0.722823	0.770381	-0.115584	0.143109
S. sarana	IMG_5845	3	0.270842	0.721778	0.823174	0.983599	0.970904	0.911483	0.865371	0.716696	0.418964	0.390051	0.0230054	-0.468215	0.544663	0.699352	0.908276	0.926929	0.902927	0.83571	0.788804	0.636087	0.34266	0.177998	0.0284086	0.198107	0.214208	0.680879	0.724137	0.700825	0.610511	0.576076	0.521478	0.566544	0.497648	0.62845	0.693753	0.499866	0.564465	0.536874	0.42139	0.419212	0.510719	0.666565	0.635001	0.748614	0.800497	-0.0854929	0.126553
S. sarana	IMG_5982	3	0.279188	0.739818	0.850088	1.00561	1.00402	0.956519	0.899766	0.741845	0.433113	0.356695	0.0155274	-0.417721	0.562352	0.729173	0.930745	0.954648	0.937272	0.88394	0.826392	0.66887	0.363537	0.142233	0.0805183	0.209488	0.285039	0.714489	0.763892	0.752701	0.68533	0.646119	0.600668	0.609477	0.554707	0.658708	0.712203	0.513044	0.588977	0.577365	0.487464	0.482216	0.582279	0.708455	0.693049	0.783575	0.827098	-0.0825523	0.134655
S. sarana	IMG_5989	3	0.246031	0.726026	0.831486	0.98464	0.991133	0.934549	0.886062	0.715485	0.414405	0.344844	0.0159881	-0.452681	0.558481	0.715895	0.912594	0.9387	0.927935	0.864772	0.816148	0.645373	0.34647	0.129754	0.0645329	0.18004	0.258685	0.688108	0.741159	0.739754	0.659793	0.629776	0.582586	0.597015	0.538461	0.645619	0.700297	0.487053	0.567767	0.568999	0.461288	0.461108	0.565009	0.689522	0.670617	0.763286	0.809607	-0.110407	0.105612
S. sarana	IMG_6043	3	0.247138	0.699682	0.825004	0.984617	0.98044	0.932535	0.886395	0.679373	0.440704	0.411081	0.0878524	-0.275568	0.515715	0.704382	0.91	0.928708	0.912536	0.856964	0.810501	0.589335	0.343802	0.1889	0.0288964	0.159056	0.299747	0.710549	0.748947	0.739026	0.663456	0.632882	0.529982	0.551304	0.467416	0.597333	0.661595	0.497593	0.558517	0.548672	0.437751	0.43968	0.539866	0.664087	0.62941	0.74186	0.792854	-0.167632	0.0940167
S. sarana	IMG_6054	3	0.283731	0.699777	0.82222	0.984442	0.978317	0.927221	0.885627	0.689549	0.426235	0.394574	0.0544981	-0.345843	0.494725	0.686556	0.901148	0.916622	0.901371	0.841929	0.800772	0.588014	0.322777	0.151339	0.0716243	0.205015	0.280624	0.705795	0.738678	0.728061	0.650298	0.6267	0.519093	0.54915	0.474304	0.604053	0.665543	0.501607	0.55324	0.542028	0.432649	0.444794	0.52599	0.66544	0.634608	0.745012	0.794007	-0.187742	0.0695571
S. sarana	IMG_6074	3	0.273626	0.780195	0.883616	1.03358	1.03527	0.975786	0.932879	0.75735	0.495364	0.420912	0.115843	-0.220166	0.622898	0.773201	0.96349	0.981905	0.97298	0.906125	0.863317	0.673988	0.412595	0.2305	0.101781	0.192065	0.306597	0.731097	0.773289	0.778802	0.693516	0.673896	0.593762	0.645009	0.596718	0.695832	0.746097	0.527462	0.591888	0.604399	0.490029	0.505882	0.579761	0.731266	0.718643	0.809614	0.852907	-0.125507	0.17641
S. sarana	IMG_6096	3	0.256164	0.780108	0.883548	1.03371	1.03145	0.975515	0.929041	0.747816	0.476846	0.403687	0.0910687	-0.240438	0.631444	0.779712	0.968226	0.990583	0.973525	0.911552	0.864802	0.672929	0.406506	0.230526	0.0953437	0.178142	0.30914	0.734047	0.783954	0.777717	0.700435	0.67476	0.602277	0.652092	0.606145	0.700444	0.747389	0.530443	0.606779	0.602711	0.50173	0.509606	0.593862	0.739367	0.726686	0.813728	0.854106	-0.0666595	0.191842
S. sarana	IMG_6110	3	0.327808	0.795845	0.916522	1.05135	1.0535	0.998046	0.946605	0.770859	0.487548	0.42708	0.0908926	-0.309609	0.629226	0.808333	0.981007	1.0103	0.993339	0.932159	0.881527	0.698883	0.422048	0.238247	0.115244	0.247728	0.376723	0.749257	0.80763	0.798561	0.719414	0.685536	0.60206	0.644557	0.595827	0.706308	0.763143	0.509753	0.607316	0.602331	0.499591	0.514189	0.61437	0.764908	0.754394	0.846906	0.890482	-0.0134343	0.208683
S. sarana	IMG_6129	3	0.3004	0.741561	0.858116	1.00039	1.00143	0.933836	0.89137	0.745629	0.450049	0.397766	0.0989896	-0.236153	0.551474	0.730047	0.917862	0.94504	0.927494	0.850689	0.808137	0.655993	0.367337	0.170144	0.0743775	0.210024	0.305867	0.701222	0.755334	0.744403	0.651317	0.630804	0.578376	0.608494	0.540892	0.643877	0.702594	0.477844	0.56547	0.555626	0.439585	0.466274	0.564358	0.713877	0.688046	0.778578	0.825108	-0.0823212	0.125026
S. sarana	IMG_6185	3	0.285242	0.751371	0.874841	1.01862	1.01795	0.960228	0.917579	0.758223	0.447344	0.400952	0.0990588	-0.291809	0.574159	0.756552	0.941447	0.96263	0.948555	0.882223	0.839937	0.672966	0.375225	0.174234	0.0374663	0.192735	0.334655	0.721481	0.768475	0.761732	0.673813	0.654119	0.59082	0.630672	0.554392	0.653994	0.715928	0.492481	0.570251	0.567368	0.447561	0.479316	0.585923	0.743925	0.711419	0.797821	0.84604	-0.0469607	0.171083
S. sarana	IMG_6209	3	0.341988	0.783303	0.893967	1.03258	1.03274	0.971971	0.92837	0.759517	0.477469	0.440657	0.0952391	-0.326058	0.594006	0.763892	0.948794	0.975151	0.958071	0.889677	0.844657	0.660581	0.40059	0.208656	0.119322	0.262807	0.319418	0.724931	0.779842	0.770329	0.690081	0.661983	0.585337	0.652546	0.577905	0.693472	0.751833	0.508058	0.596993	0.591243	0.498311	0.508018	0.592776	0.754455	0.719969	0.821081	0.868074	-0.0407582	0.167908
S. sarana	IMG_6238	3	0.293694	0.753851	0.867515	1.01132	1.01957	0.953489	0.900788	0.740457	0.459649	0.386891	0.0926154	-0.298812	0.577101	0.749334	0.93517	0.965531	0.954498	0.87991	0.82702	0.655782	0.386998	0.178056	0.103975	0.2236	0.318084	0.710845	0.77227	0.772109	0.676748	0.64496	0.566979	0.616192	0.56066	0.662748	0.722115	0.486912	0.58441	0.589458	0.460793	0.474202	0.555107	0.717662	0.703953	0.791677	0.840037	-0.0114767	0.198767
S. sarana	IMG_6707	3	0.398391	0.896647	1.00458	1.16563	1.16423	1.09747	1.05454	0.868838	0.520103	0.471248	0.0857542	-0.352079	0.736675	0.892868	1.09621	1.11464	1.1023	1.02755	0.983315	0.789841	0.464579	0.283165	0.206448	0.321308	0.420748	0.869079	0.911403	0.908464	0.812097	0.781202	0.721192	0.785522	0.737709	0.829677	0.871853	0.678773	0.742222	0.743008	0.619187	0.617671	0.72957	0.88915	0.868068	0.950151	0.985036	0.0672941	0.326479
P. sophore	IMG_4790	4	0.0819591	0.435207	0.572511	0.695009	0.692953	0.642929	0.59302	0.461318	0.205259	0.165036	-0.0959881	-0.539704	0.183611	0.412813	0.582961	0.607916	0.589011	0.527759	0.474784	0.332862	0.0747799	-0.124036	-0.189123	-0.0244717	0.0551871	0.376431	0.422393	0.408732	0.32897	0.295611	0.24672	0.271586	0.186419	0.305222	0.388794	0.096632	0.178833	0.16462	0.0497993	0.098055	0.246499	0.4048	0.374272	0.472683	0.537882	-0.470968	-0.187033
P. sophore	IMG_4855	4	0.0999567	0.642544	0.739754	0.901573	0.898533	0.831582	0.783875	0.615477	0.31921	0.262665	-0.134203	-0.548459	0.505286	0.644379	0.843725	0.867043	0.847486	0.775035	0.72676	0.557591	0.261667	0.118	-0.0836777	0.0304378	0.160258	0.609541	0.658307	0.646129	0.556592	0.523694	0.480294	0.510518	0.468569	0.570905	0.617231	0.421604	0.492649	0.476107	0.356236	0.347779	0.454952	0.593109	0.580126	0.679001	0.717837	-0.235831	0.0143945
P. sophore	IMG_4861	4	0.232717	0.667462	0.785572	0.93592	0.940477	0.884461	0.858549	0.658898	0.344097	0.259307	-0.0987052	-0.428082	0.474973	0.65511	0.850658	0.870568	0.863097	0.798989	0.773596	0.569526	0.281579	0.0458313	0.00402027	0.130784	0.217694	0.625631	0.665797	0.66559	0.579715	0.565659	0.498421	0.545307	0.494767	0.587801	0.631251	0.412645	0.474435	0.477063	0.357191	0.369253	0.513084	0.659641	0.644251	0.72489	0.758246	-0.229111	0.0343477
P. sophore	IMG_4875	4	0.113208	0.540367	0.654099	0.819248	0.816056	0.749358	0.698466	0.527308	0.24534	0.211468	-0.133134	-0.534781	0.346842	0.522744	0.740323	0.761845	0.745941	0.670673	0.618676	0.445215	0.188113	0.000520841	-0.0995509	0.0257154	0.0765312	0.533327	0.577043	0.56685	0.470895	0.432007	0.372986	0.409477	0.325495	0.446273	0.504593	0.346725	0.413618	0.405875	0.286973	0.284273	0.384658	0.516125	0.475424	0.579017	0.62559	-0.272353	-0.0312183
P. sophore	IMG_4885	4	0.173099	0.635273	0.728889	0.914465	0.905477	0.848565	0.814341	0.616581	0.301876	0.235655	-0.105285	-0.532495	0.45626	0.598145	0.838389	0.856572	0.835532	0.770351	0.735447	0.539214	0.240449	0.0211066	0.0020364	0.09128	0.0961798	0.625035	0.666246	0.647999	0.562007	0.539214	0.500209	0.522196	0.463699	0.562602	0.606177	0.474275	0.530123	0.50768	0.395501	0.387141	0.495419	0.604755	0.577423	0.665778	0.704734	-0.152464	0.0662514
P. sophore	IMG_4991	4	0.151891	0.621155	0.699968	0.884472	0.87616	0.816963	0.774743	0.588204	0.294113	0.243534	-0.0966604	-0.507519	0.451556	0.575292	0.815066	0.835938	0.814674	0.749512	0.707451	0.520759	0.238548	0.0499929	-0.0415365	0.065953	0.0531169	0.598342	0.643956	0.628368	0.54931	0.522353	0.465517	0.490815	0.43146	0.537857	0.589179	0.455028	0.515344	0.495336	0.394101	0.378707	0.436274	0.55341	0.526081	0.626648	0.672393	-0.213234	0.0213961
P. sophore	IMG_4995	4	0.193347	0.647715	0.740315	0.919523	0.918602	0.866358	0.816182	0.62557	0.282803	0.248905	-0.130633	-0.554349	0.467416	0.6089	0.843033	0.857212	0.849266	0.789306	0.73736	0.552291	0.247015	0.0489077	0.00483706	0.117139	0.0970837	0.625096	0.657859	0.657696	0.575107	0.533353	0.504851	0.540342	0.472376	0.574795	0.620188	0.472888	0.518409	0.520798	0.412276	0.386338	0.505096	0.625734	0.587082	0.67931	0.717762	-0.251463	0.00885556
P. sophore	IMG_5007	4	0.154363	0.61831	0.726727	0.88892	0.889033	0.838969	0.794732	0.61475	0.282917	0.230602	-0.154412	-0.554925	0.439664	0.601821	0.812933	0.837317	0.821173	0.764116	0.718485	0.538322	0.218955	0.0213134	-0.0192787	0.0862886	0.144013	0.601386	0.652246	0.643512	0.57059	0.538523	0.491782	0.506194	0.445651	0.549567	0.592354	0.415124	0.492104	0.485736	0.391641	0.382575	0.4866	0.604852	0.577055	0.66928	0.704939	-0.171295	0.0419451
P. sophore	IMG_5009	4	0.125611	0.615719	0.72636	0.899131	0.900864	0.83861	0.795219	0.609701	0.224041	0.184294	-0.239005	-0.683149	0.45108	0.611766	0.830204	0.849696	0.839233	0.769547	0.726116	0.547282	0.237267	0.0304378	-0.0139632	0.0873554	0.146717	0.61657	0.65946	0.656204	0.566261	0.539854	0.509861	0.550265	0.471497	0.560791	0.599665	0.437338	0.500675	0.500003	0.382953	0.385338	0.511843	0.645953	0.599512	0.680354	0.712187	-0.174016	0.0418268
P. sophore	IMG_5019	4	0.115976	0.540855	0.650395	0.825485	0.82365	0.750902	0.707153	0.531389	0.224067	0.190304	-0.200418	-0.692034	0.344097	0.515039	0.746377	0.768335	0.753238	0.669298	0.625014	0.446009	0.171053	-0.0157653	-0.0546398	0.0696311	0.0643082	0.546629	0.590307	0.581335	0.470543	0.440311	0.378634	0.419427	0.343861	0.464683	0.519684	0.373206	0.437592	0.430301	0.286501	0.286209	0.381241	0.520889	0.482702	0.587745	0.632366	-0.267558	-0.0281677
P. sophore	IMG_5028	4	0.163132	0.600646	0.706334	0.873582	0.870685	0.810669	0.769953	0.575049	0.269256	0.245414	-0.158478	-0.572011	0.419675	0.582949	0.799664	0.822292	0.806377	0.738091	0.699612	0.504797	0.224895	0.0523091	-0.0016927	0.0953089	0.114878	0.580993	0.626659	0.616423	0.520798	0.498062	0.421505	0.462638	0.391094	0.52437	0.57207	0.400192	0.46706	0.456928	0.326684	0.334072	0.427064	0.566155	0.5319	0.644153	0.683146	-0.22253	0.0279201
P. sophore	IMG_5043	4	0.123688	0.588384	0.706752	0.867031	0.857333	0.79572	0.756773	0.589369	0.260429	0.22474	-0.148295	-0.559831	0.412141	0.585506	0.791094	0.807718	0.786553	0.716037	0.675751	0.511656	0.197722	0.0169498	-0.075576	0.0493343	0.127137	0.570391	0.60738	0.586193	0.48948	0.459679	0.438542	0.468259	0.399224	0.509767	0.559859	0.37634	0.434776	0.410845	0.287331	0.295061	0.458441	0.586261	0.551572	0.644498	0.68392	-0.245514	-0.0191561
P. sophore	IMG_5051	4	0.0691499	0.590496	0.692053	0.85936	0.848201	0.784175	0.741427	0.563884	0.25679	0.171434	-0.198192	-0.683589	0.444388	0.590942	0.802165	0.817202	0.798789	0.728654	0.687351	0.514906	0.214632	0.0434409	-0.0489006	0.022057	0.112571	0.590987	0.629369	0.622421	0.536154	0.51635	0.472961	0.473779	0.439396	0.52943	0.571313	0.415541	0.473706	0.471878	0.366535	0.376084	0.461948	0.560899	0.554235	0.63798	0.675137	-0.246118	0.0390967
P. sophore	IMG_5243	4	0.109072	0.619813	0.720358	0.897385	0.900099	0.830986	0.784161	0.606489	0.273048	0.240549	-0.218711	-0.697344	0.466764	0.612773	0.833632	0.858591	0.844421	0.768061	0.721341	0.541467	0.257583	0.111296	-0.0112271	0.0684085	0.131234	0.613609	0.665337	0.659098	0.56103	0.532257	0.473341	0.533047	0.463579	0.565612	0.603263	0.442511	0.515198	0.508301	0.37798	0.373629	0.455241	0.614011	0.573243	0.672541	0.705581	-0.156842	0.063971
P. sophore	IMG_5599	4	0.263305	0.684926	0.787581	0.967698	0.964703	0.885717	0.833651	0.66664	0.390352	0.335779	0.0113166	-0.50034	0.491628	0.65459	0.892679	0.90947	0.899273	0.808069	0.754669	0.576261	0.307111	0.100026	0.0479365	0.190612	0.191199	0.692988	0.72914	0.727492	0.603253	0.560588	0.472435	0.522614	0.465204	0.588585	0.65606	0.52893	0.581153	0.583335	0.418831	0.403103	0.466378	0.623146	0.605768	0.709287	0.764609	-0.153354	0.114578
P. sophore	IMG_5633	4	0.102091	0.573139	0.693876	0.867591	0.862632	0.787694	0.739588	0.576468	0.310268	0.238197	-0.107905	-0.639615	0.402261	0.581028	0.801321	0.822345	0.803696	0.717845	0.668935	0.498986	0.224973	0.0273904	-0.064256	0.0432837	0.153418	0.603101	0.64659	0.6319	0.513324	0.477295	0.400969	0.418019	0.360063	0.489227	0.54942	0.41283	0.479172	0.462982	0.296841	0.295611	0.389698	0.529764	0.518066	0.624447	0.674411	-0.200129	0.00889811
P. sophore	IMG_5788	4	0.183924	0.661301	0.762821	0.923332	0.92313	0.862716	0.812512	0.651433	0.340246	0.295237	-0.0484294	-0.58833	0.492718	0.644714	0.854057	0.876835	0.863341	0.794962	0.743384	0.577089	0.279872	0.103804	-0.00138761	0.126975	0.172048	0.642405	0.690922	0.690081	0.60231	0.565376	0.502932	0.537832	0.474551	0.580024	0.639237	0.462952	0.536028	0.542302	0.431428	0.419278	0.485224	0.627058	0.598046	0.693788	0.74405	-0.168476	0.0943313
P. sophore	IMG_5811	4	0.207634	0.674824	0.772072	0.923109	0.92924	0.878142	0.842703	0.670404	0.291569	0.247728	-0.0945549	-0.540442	0.506491	0.654359	0.850187	0.877314	0.86709	0.81032	0.777238	0.610788	0.281102	0.0852192	0.00277063	0.133347	0.166578	0.61326	0.668423	0.67071	0.596597	0.582257	0.534267	0.569655	0.509404	0.597267	0.647969	0.421966	0.504226	0.511923	0.414689	0.425518	0.512884	0.658164	0.62844	0.708931	0.750393	-0.176382	0.0832517
P. sophore	IMG_7931	4	0.129077	0.618079	0.707723	0.848977	0.848362	0.797254	0.755417	0.589492	0.283414	0.264227	-0.11006	-0.52298	0.453502	0.58816	0.772366	0.791122	0.781317	0.723127	0.682957	0.514866	0.215955	0.0694091	-0.0777833	0.0688906	0.0911039	0.52652	0.576053	0.58245	0.508462	0.500085	0.466126	0.497151	0.428572	0.538297	0.593098	0.329255	0.404098	0.418848	0.322612	0.351719	0.44548	0.572093	0.533098	0.638739	0.684809	-0.224783	0.0328201
P. sophore	IMG_7949	4	0.108362	0.565482	0.666331	0.819807	0.815	0.760671	0.70837	0.548709	0.225594	0.194126	-0.141493	-0.632924	0.387301	0.541592	0.743431	0.760551	0.746642	0.684639	0.632032	0.472083	0.161757	-0.00835313	-0.120738	0.0295461	0.070555	0.520706	0.560755	0.555735	0.474493	0.443435	0.406063	0.437322	0.37623	0.477005	0.537466	0.330637	0.391852	0.390334	0.283799	0.290146	0.394714	0.531083	0.501648	0.593939	0.643956	-0.320618	-0.0608753
P. ticto	IMG_8951	5	0.0459485	0.533225	0.627939	0.797911	0.797842	0.725577	0.66544	0.478336	0.153144	0.142014	-0.19552	-0.548444	0.370772	0.51545	0.731339	0.753943	0.741467	0.66221	0.608184	0.432873	0.131683	-0.00624643	-0.169784	-0.0707548	0.0568668	0.515529	0.56745	0.566885	0.473122	0.467475	0.439048	0.433786	0.369067	0.450449	0.495863	0.334132	0.407272	0.408138	0.283889	0.330961	0.42462	0.510599	0.473239	0.558132	0.598199	-0.217879	0.00744904
P. ticto	IMG_8952	5	-0.0218652	0.48752	0.602895	0.75003	0.744019	0.67476	0.61901	0.443247	0.09691	0.0920536	-0.248998	-0.718558	0.331893	0.499343	0.68489	0.703678	0.687467	0.610852	0.558853	0.393944	0.0957271	-0.0873848	-0.155448	-0.0903531	0.0792174	0.470308	0.517328	0.514136	0.424718	0.417588	0.403755	0.414589	0.322343	0.420962	0.463266	0.244623	0.321205	0.324653	0.212747	0.274712	0.403498	0.508987	0.456062	0.543807	0.582552	-0.289324	-0.0398861
P. ticto	IMG_8953	5	-0.00730513	0.502878	0.609477	0.752755	0.750207	0.681368	0.626043	0.466897	0.147367	0.0980204	-0.231651	-0.698059	0.347252	0.50345	0.685464	0.704974	0.69223	0.615529	0.562507	0.410541	0.116076	-0.0882034	-0.1807	-0.0801273	0.0705181	0.463445	0.512764	0.516218	0.426202	0.41489	0.403652	0.413065	0.340008	0.429849	0.477772	0.2396	0.318502	0.330799	0.21532	0.264558	0.387141	0.496362	0.462203	0.545802	0.588216	-0.295172	-0.0358441
P. ticto	IMG_8954	5	-0.0409729	0.481872	0.600417	0.754639	0.74612	0.681431	0.627079	0.458154	0.13373	0.0888092	-0.241603	-0.698016	0.330617	0.499151	0.6917	0.708336	0.69079	0.618686	0.567003	0.401418	0.0977777	-0.100201	-0.230165	-0.110614	0.0779127	0.481901	0.525304	0.520615	0.43329	0.422557	0.38991	0.395344	0.317123	0.406489	0.457519	0.264582	0.334755	0.33676	0.224611	0.277197	0.383977	0.492285	0.454952	0.536874	0.579658	-0.284005	-0.0234254
P. ticto	IMG_8955	5	0.00715011	0.464639	0.579246	0.71846	0.730071	0.654735	0.608098	0.468273	0.138113	0.0761305	-0.164303	-0.498174	0.279781	0.451326	0.633175	0.646952	0.654408	0.56969	0.52437	0.382287	0.0678517	-0.155821	-0.219452	-0.0966061	0.0244446	0.407985	0.444248	0.471981	0.380519	0.374363	0.347428	0.364213	0.29787	0.37055	0.425094	0.177969	0.236663	0.284814	0.179063	0.235124	0.334695	0.462488	0.43329	0.499687	0.545295	-0.419908	-0.114611
P. ticto	IMG_8956	5	0.0577802	0.476962	0.610064	0.741435	0.743768	0.675879	0.62182	0.4691	0.112906	0.109848	-0.129134	-0.466966	0.270656	0.476658	0.650026	0.670645	0.661604	0.5851	0.532716	0.38003	0.040365	-0.157029	-0.186146	-0.0415508	0.103564	0.439127	0.483445	0.487605	0.405944	0.39368	0.363273	0.367356	0.288808	0.373151	0.435462	0.172924	0.249247	0.264251	0.17339	0.246917	0.371197	0.495392	0.45632	0.527166	0.575707	-0.360334	-0.0751111
P. ticto	IMG_8957	5	0.0230054	0.472581	0.597245	0.732249	0.739778	0.668656	0.612561	0.476846	0.131843	0.114811	-0.121685	-0.481486	0.284769	0.472917	0.648135	0.671885	0.665506	0.58625	0.530955	0.394347	0.0459485	-0.103083	-0.20137	-0.115454	0.0740847	0.427502	0.478927	0.485707	0.399293	0.38162	0.352221	0.353031	0.291613	0.368807	0.424228	0.176062	0.261715	0.278365	0.176988	0.23396	0.341157	0.47041	0.440878	0.511389	0.559703	-0.326362	-0.0838884
P. ticto	IMG_8958	5	0.0556077	0.497123	0.610799	0.740284	0.747342	0.677607	0.622027	0.479964	0.121954	0.144854	-0.128275	-0.453988	0.304684	0.480007	0.65055	0.676172	0.668293	0.589145	0.535585	0.395187	-0.100688	0.079326	-0.197083	-0.0690662	0.0688906	0.419675	0.474668	0.483188	0.395379	0.388829	0.37462	0.322281	0.390405	0.395449	0.450803	0.168291	0.258086	0.276186	0.167288	0.241522	0.363405	0.456169	0.490506	0.526662	0.572767	-0.339875	-0.0664672
P. ticto	IMG_8959	5	0.0285306	0.456336	0.591832	0.731258	0.73436	0.657992	0.608323	0.459634	0.0888092	0.0988167	-0.134878	-0.499037	0.256934	0.464966	0.646678	0.660571	0.659355	0.573626	0.527488	0.380392	0.0560659	-0.104765	-0.199255	-0.0606605	0.0924048	0.441899	0.476817	0.489719	0.393048	0.385767	0.348149	0.362237	0.277609	0.349608	0.417073	0.186561	0.246326	0.274989	0.159778	0.235655	0.348791	0.487266	0.440279	0.506519	0.55908	-0.354823	-0.0849169
P. ticto	IMG_8960	5	0.00432137	0.455271	0.573591	0.714791	0.719961	0.652701	0.597015	0.443607	0.112404	0.101094	-0.144378	-0.47357	0.268905	0.448428	0.631799	0.654427	0.647178	0.571453	0.518948	0.367952	0.0702596	-0.138561	-0.212306	-0.113171	0.0360297	0.410642	0.460372	0.468214	0.380844	0.372894	0.345021	0.360593	0.261406	0.3528	0.40924	0.175628	0.255297	0.273349	0.16343	0.23096	0.340127	0.462113	0.408376	0.487591	0.535243	-0.349731	-0.0778405
P. ticto	IMG_8961	5	0.0228406	0.522092	0.634951	0.766837	0.769459	0.704871	0.661112	0.492774	0.174234	0.136721	-0.244544	-0.570748	0.361066	0.526869	0.69521	0.716496	0.707272	0.635866	0.598046	0.439869	0.168468	-0.00393073	-0.17114	-0.0494745	0.108193	0.467416	0.518224	0.525045	0.444841	0.457064	0.442135	0.453395	0.373151	0.45068	0.493709	0.219323	0.304512	0.322219	0.221727	0.306489	0.430204	0.537126	0.492537	0.575373	0.609786	-0.305009	-0.0492166
P. ticto	IMG_8962	5	-0.0565154	0.514202	0.611011	0.75307	0.763151	0.696941	0.652391	0.478047	0.164234	0.115011	-0.252278	-0.678878	0.381458	0.515953	0.691373	0.718601	0.710507	0.63768	0.597509	0.429946	0.148201	-0.0347418	-0.232636	-0.155299	0.0392951	0.445573	0.508422	0.519487	0.433338	0.44562	0.433994	0.449031	0.366946	0.447778	0.486969	0.231877	0.328298	0.348402	0.23621	0.305781	0.416407	0.516139	0.468052	0.55167	0.588294	-0.275757	-0.030971
P. ticto	IMG_8963	5	0.0424574	0.494015	0.604258	0.75751	0.757199	0.697822	0.642959	0.463191	0.16468	0.176988	-0.141583	-0.502918	0.308991	0.477396	0.678282	0.69392	0.68777	0.620261	0.56765	0.394557	0.134783	0.00216606	-0.140952	-0.0547333	0.0432837	0.466319	0.506491	0.515423	0.433306	0.416923	0.389644	0.404406	0.307603	0.403172	0.455119	0.261072	0.324262	0.344491	0.239325	0.277013	0.391923	0.493904	0.430688	0.525848	0.571278	-0.310807	-0.0413931
P. ticto	IMG_8964	5	0.0666613	0.527075	0.63818	0.777912	0.776098	0.716846	0.662389	0.48993	0.194736	0.195069	-0.0984273	-0.436733	0.346725	0.51488	0.697805	0.716513	0.705402	0.63773	0.58625	0.421209	0.152258	0.0003039	-0.187287	-0.0465689	0.0824981	0.474624	0.521112	0.523642	0.440862	0.432793	0.418831	0.429219	0.33624	0.423475	0.483673	0.249541	0.325475	0.337619	0.23175	0.292455	0.423229	0.521844	0.465963	0.553033	0.601854	-0.282396	-0.0303838
P. ticto	IMG_8965	5	0.0211066	0.509418	0.610926	0.759736	0.756887	0.692265	0.635916	0.456852	0.15564	0.154211	-0.145402	-0.498722	0.344176	0.495308	0.686377	0.705256	0.692635	0.619938	0.566708	0.395326	0.115777	-0.0254054	-0.188532	-0.0757983	0.0354297	0.456199	0.504362	0.505069	0.416424	0.408901	0.397749	0.410035	0.328848	0.416907	0.471893	0.250859	0.324324	0.330941	0.216984	0.272051	0.3986	0.494405	0.444888	0.531517	0.578249	-0.284038	-0.0387593
P. ticto	IMG_8966	5	0.225361	0.523681	0.634326	0.79235	0.789877	0.719306	0.658364	0.518014	0.20515	0.182358	-0.120302	-0.479883	0.229733	0.440862	0.676575	0.70682	0.68874	0.602158	0.545604	0.423901	0.192233	0.0195317	0.0322963	0.141512	0.0606601	0.50199	0.55455	0.544205	0.437211	0.41407	0.400244	0.407918	0.330718	0.421522	0.480294	0.307004	0.387425	0.38032	0.241795	0.283437	0.396304	0.506978	0.465621	0.552181	0.599829	-0.271898	-0.0191471
P. ticto	IMG_8967	5	0.212161	0.511803	0.65328	0.79256	0.794258	0.719878	0.672836	0.521112	0.206421	0.184635	-0.106971	-0.506416	0.215558	0.475802	0.678309	0.708939	0.694632	0.604194	0.562721	0.426235	0.196231	0.00834463	-0.00547169	0.137037	0.161068	0.513098	0.565718	0.559775	0.451433	0.440122	0.408206	0.409595	0.318919	0.401986	0.472318	0.257775	0.350229	0.35253	0.21096	0.281011	0.415107	0.535737	0.491782	0.571523	0.62298	-0.250472	-0.0109464
P. ticto	IMG_8968	5	0.077949	0.515198	0.625271	0.779661	0.778158	0.704528	0.647403	0.503682	0.175657	0.166874	-0.164677	-0.57983	0.321909	0.491123	0.696094	0.72035	0.703618	0.618676	0.562495	0.423148	0.122478	-0.0458637	-0.172915	-0.0120122	0.0449707	0.483487	0.534572	0.526636	0.421555	0.403258	0.3906	0.408443	0.326438	0.421423	0.481242	0.286793	0.366031	0.362426	0.234644	0.280715	0.393452	0.508503	0.460672	0.550045	0.597849	-0.275978	-0.0425555
P. ticto	IMG_8969	5	0.118959	0.533098	0.656951	0.796623	0.79912	0.730411	0.675265	0.507667	0.188422	0.196646	-0.123067	-0.501359	0.326786	0.521792	0.708242	0.734336	0.721942	0.642296	0.587969	0.43043	0.1442	-0.008867	-0.115732	0.021272	0.125644	0.499563	0.553021	0.552169	0.453639	0.430784	0.418865	0.426137	0.340246	0.435621	0.493974	0.261548	0.350771	0.358753	0.231852	0.278936	0.432617	0.540029	0.490941	0.580092	0.626186	-0.2436	0.000477461
P. ticto	IMG_8970	5	0.0628451	0.506951	0.616832	0.74969	0.757715	0.688927	0.633064	0.491123	0.131298	0.111699	-0.133175	-0.481381	0.315865	0.484556	0.659954	0.67397	0.678127	0.600853	0.546061	0.405346	0.076422	-0.160233	-0.17499	-0.0467624	0.0556841	0.426349	0.465204	0.48848	0.405688	0.394854	0.381602	0.406762	0.326664	0.41049	0.465665	0.188928	0.250981	0.292345	0.195152	0.255948	0.372894	0.505733	0.463893	0.536053	0.582359	-0.356241	-0.0785893
[truncated: 43 more columns]
